# Supplementary material
Source: PubMed Central journal article supplement (PMC6216207)
Supplement: ddy286_supp.pdf [file ddy286_supp.pdf]

**Supplementary Table I.**

| Primer Name       | Purpose                                                   | Sequence (5'-3')                                                                                                                       |
|-------------------|-----------------------------------------------------------|----------------------------------------------------------------------------------------------------------------------------------------|
| Dmc1-M200V-For    | Genotypes M200V allele                                    | CTAAGCTGCTGTTTGCCACA                                                                                                                   |
| Dmc1-M200V-Rev    | Genotypes M200V allele                                    | CTTGGCTGCGACATAATCAA                                                                                                                   |
| Dmc1-neo-For      | Genotypes null allele<br>( <i>Dmc1<sup>tm1Jcs</sup></i> ) | CCACTGCCCCGGCCAGATTACAT                                                                                                                |
| Dmc1-neo-Rev      | Genotypes null allele<br>( <i>Dmc1<sup>tm1Jcs</sup></i> ) | GACTAGGGGAGGAGTAGAAGGT                                                                                                                 |
| Dmc1-wildtype-For | Genotypes wild type allele                                | GAGGTGGCATTGAAAGTATGG                                                                                                                  |
| Dmc1-wildtype-Rev | Genotypes wild type allele                                | GCTTGAATGATCCTGCATT                                                                                                                    |
| ssODN             | HR template used for<br>CRISPR/Cas9                       | GAGCACAGCCTCTGCTTCCAGC<br>TTTTATGACATTTTCTTTTCCCC<br>TCAGGTGAGCATCAGGTAGAGC<br>TACTCGATTATGTCGCAGCCAAG<br>TTTCATGAGGAAGCTGGCATT<br>CAA |
| sgRNA             | Guide sequence used for<br>CRISPR/Cas9                    | CCCCTCAGGTGAGCATCAGA                                                                                                                   |
